# Supplementary material for: An analysis of abnormalities in the B cell receptor repertoire in patients with systemic sclerosis using high-throughput sequencing
Source: PubMed Central journal article supplement (PMC6968515; doi:10.7717/peerj.8370), 2020-01-14

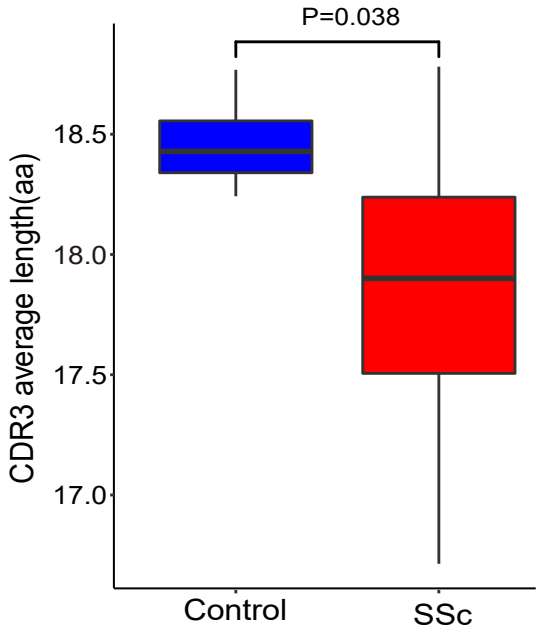

Supplement: peerj-08-8370-s004.pdf [file peerj-08-8370-s004.pdf]
